# Supplementary material
Source: PubMed Central journal article supplement (PMC9884995)

**Figure S1. Flowchart of inclusion of beneficiaries in analyses**

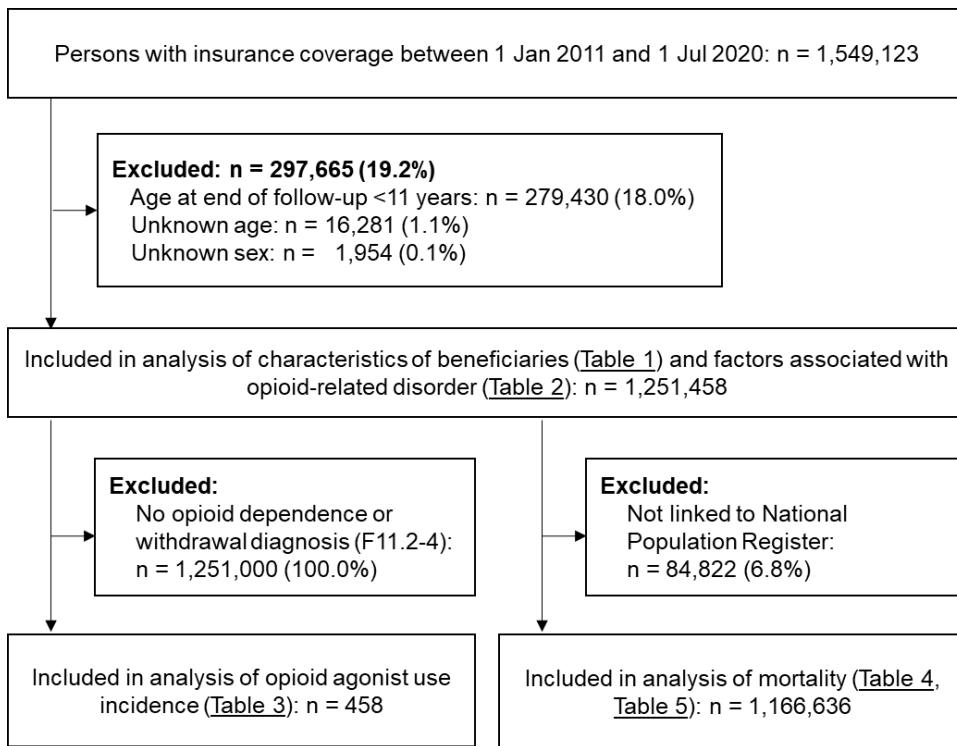

Supplement: NIHMS1867734-supplement-1.pdf [file NIHMS1867734-supplement-1.pdf]
